# Supplementary material
Source: publisher figshare collection journal article supplement (https://karger.figshare.com/articles/dataset/_/5402035)
Supplement: Supplementary file 1 [file 1]

Archive with 4 entries (4 files):
- 480426-sm1.pdf
- 480426_sm2.PDF
- 480426_sm3.PDF
- 480426_sm4.PDF
