# Supplementary material
Source: publisher figshare collection journal article supplement (https://karger.figshare.com/articles/dataset/_/5402035)
Supplement: Supplementary file 1 [file 1 › 480426-sm1.pdf]

# **Injury Resistance in the Setting of Liver Fibrosis is Accompanied by the Inhibition of HMGB1 Translocation and Release**

## **Supplementary information**

### **Immunofluorescence (IF) studies**

Liver tissue samples were snap frozen in liquid nitrogen and embedded in Tissue-Tek OCT compound. The liver sections were fixed and stained with the following primary antibodies: goat anti-mouse type I collagen (Col-1) monoclonal antibody (1:200; Southern Biotech, CA, USA), FITC-anti-mouse smooth muscle actin (SMA) monoclonal antibody (1:500; Sigma, St Louis, MO, USA), PE-Cy5-anti-mouse F4/80 (1:100; eBioscience, San Diego, CA), FITC-anti-mouse F4/80 (1:100; eBioscience, San Diego, CA), and rabbit anti-mouse high-mobility group box-1 (HMGB1) monoclonal antibody (1:100; Abcam, Cambridge, MA, USA). As an indirect IF staining for HMGB1 and Col-1, FITC-conjugated donkey anti-rabbit IgG (1:500; Sigma, St Louis, MO, USA), Cy3-conjugated rabbit anti-goat IgG (1:500; Sigma, St Louis, MO, USA), and FITC-chicken anti-goat IgG (1:500; Santa Cruz Biotechnology, Dallas, TX, USA) were used. Nikon Inverted Fluorescence Microscope ECLIPSE Ti (Nikon Corporation, Japan) and NIS-Elements F 3.0 Software were applied for image capture.

**Supplementary Fig. 1** Mice were injected intraperitoneally with CCl<sub>4</sub>, twice a week, for 6 weeks. Liver fibrosis was verified by Masson staining (1A) and

immunofluorescence analysis for alpha-smooth muscle actin ( $\alpha$ -SMA) (1B). The expression of hepatic Cyp2E1 in the control and fibrotic mice with or without acute insult was determined by RT-PCR analysis (1C).

**Supplementary Fig. 2** Mice were injected intraperitoneally with CCl<sub>4</sub>, twice a week, for 6 weeks. By the end of fibrosis induction, CCl<sub>4</sub> administration was stopped to achieve spontaneous regression. The observation points were set at Day 6 and Day 12 during the regression phase, namely, R6d and R12d. Fibrosis regression was verified by immunofluorescence analysis for type I collagen (Col-1) (upper) and Masson staining (lower).

**Supplementary Fig. 3** The intimate correlation between HMGB1 and Kupffer cells in the fibrotic liver. (A) F4/80, a surrogate marker of Kupffer cell, was co-localized with alpha-smooth muscle actin ( $\alpha$ -SMA). (B) Immunofluorescent staining of frozen sections was conducted to determine the co-localization of high-mobility group box-1 (HMGB1), F4/80, and type I collagen (Col-1).
