# Supplementary material
Source: publisher figshare collection journal article supplement (https://karger.figshare.com/articles/dataset/_/5402035)

## Supplementary Figure 1

**A**      **Fibrosis, Masson**

200x

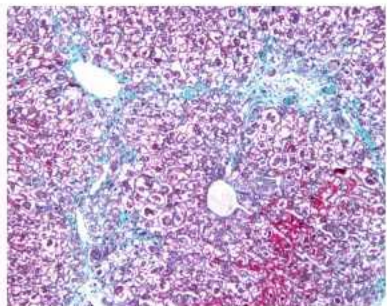

**B**      **Fibrosis,  $\alpha$ -SMA**

100x

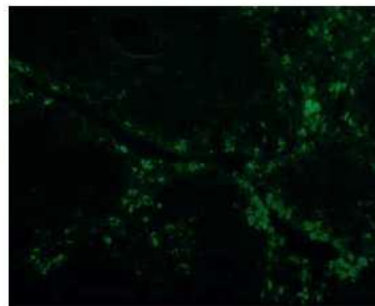

**C**

**CYP2E1 mRNA**

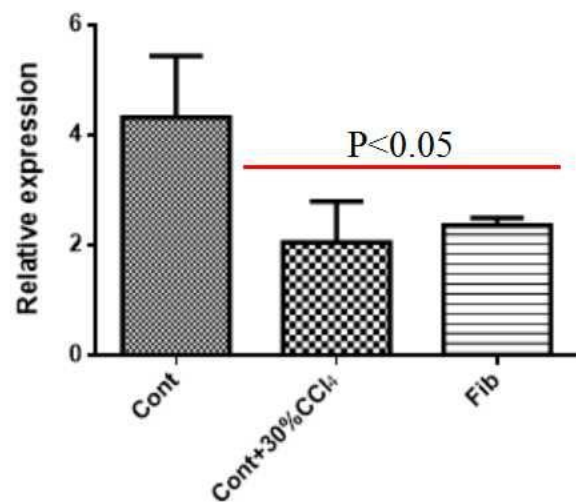

Supplement: Supplementary file 1 [file 1 › 480426_sm2.PDF]

## Supplementary Figure 2

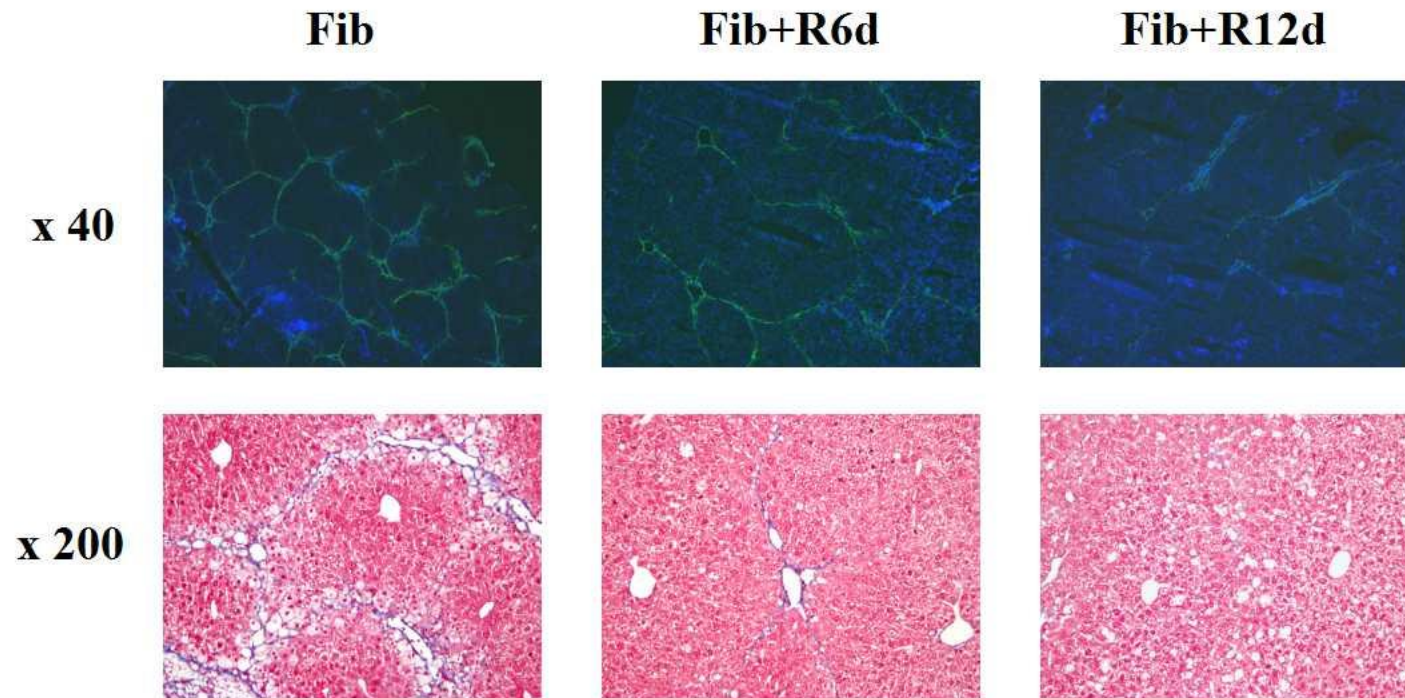

Supplement: Supplementary file 1 [file 1 › 480426_sm3.PDF]

## Supplementary Figure 3

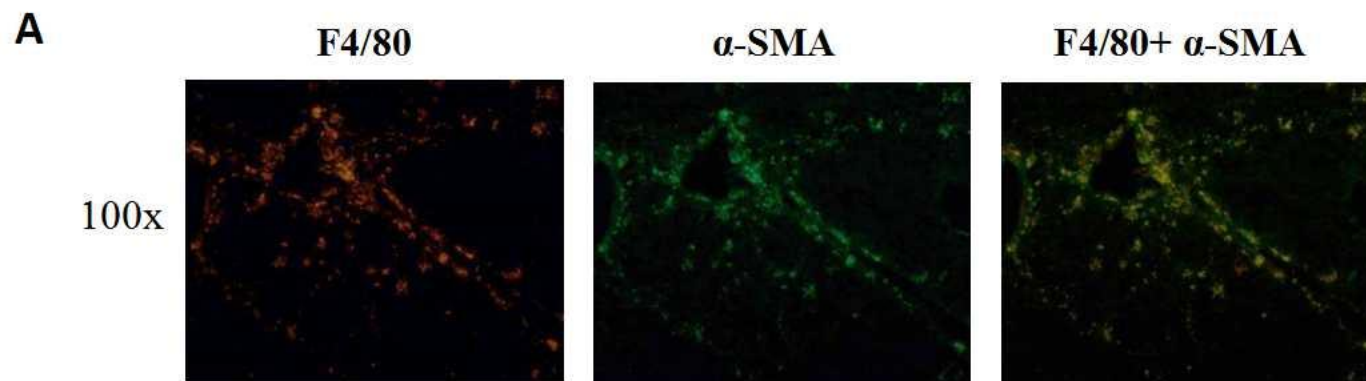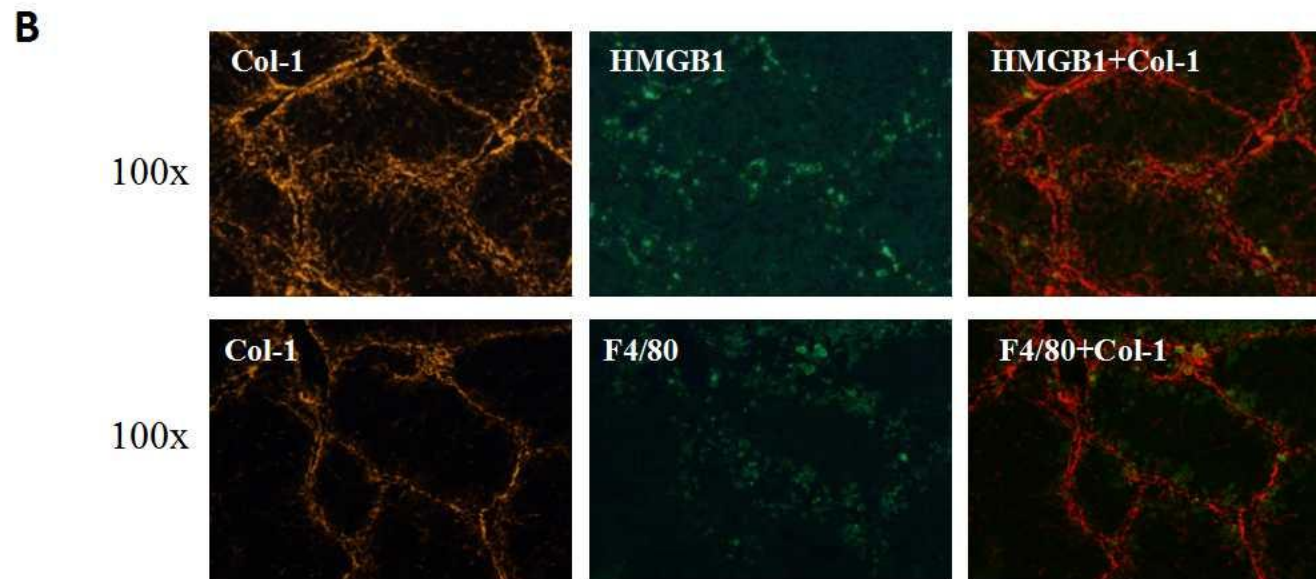

Supplement: Supplementary file 1 [file 1 › 480426_sm4.PDF]
